# Supplementary material for: A Novel Non-Psychoactive Fatty Acid from a Marine Snail, Conus inscriptus, Signals Cannabinoid Receptor 1 (CB1) to Accumulate Apoptotic C16:0 and C18:0 Ceramides in Teratocarcinoma Cell Line PA1
Source: MDPI journal article supplement (doi:10.3390/molecules29081737), 2024-04-11
Supplement: s1 [file s1]

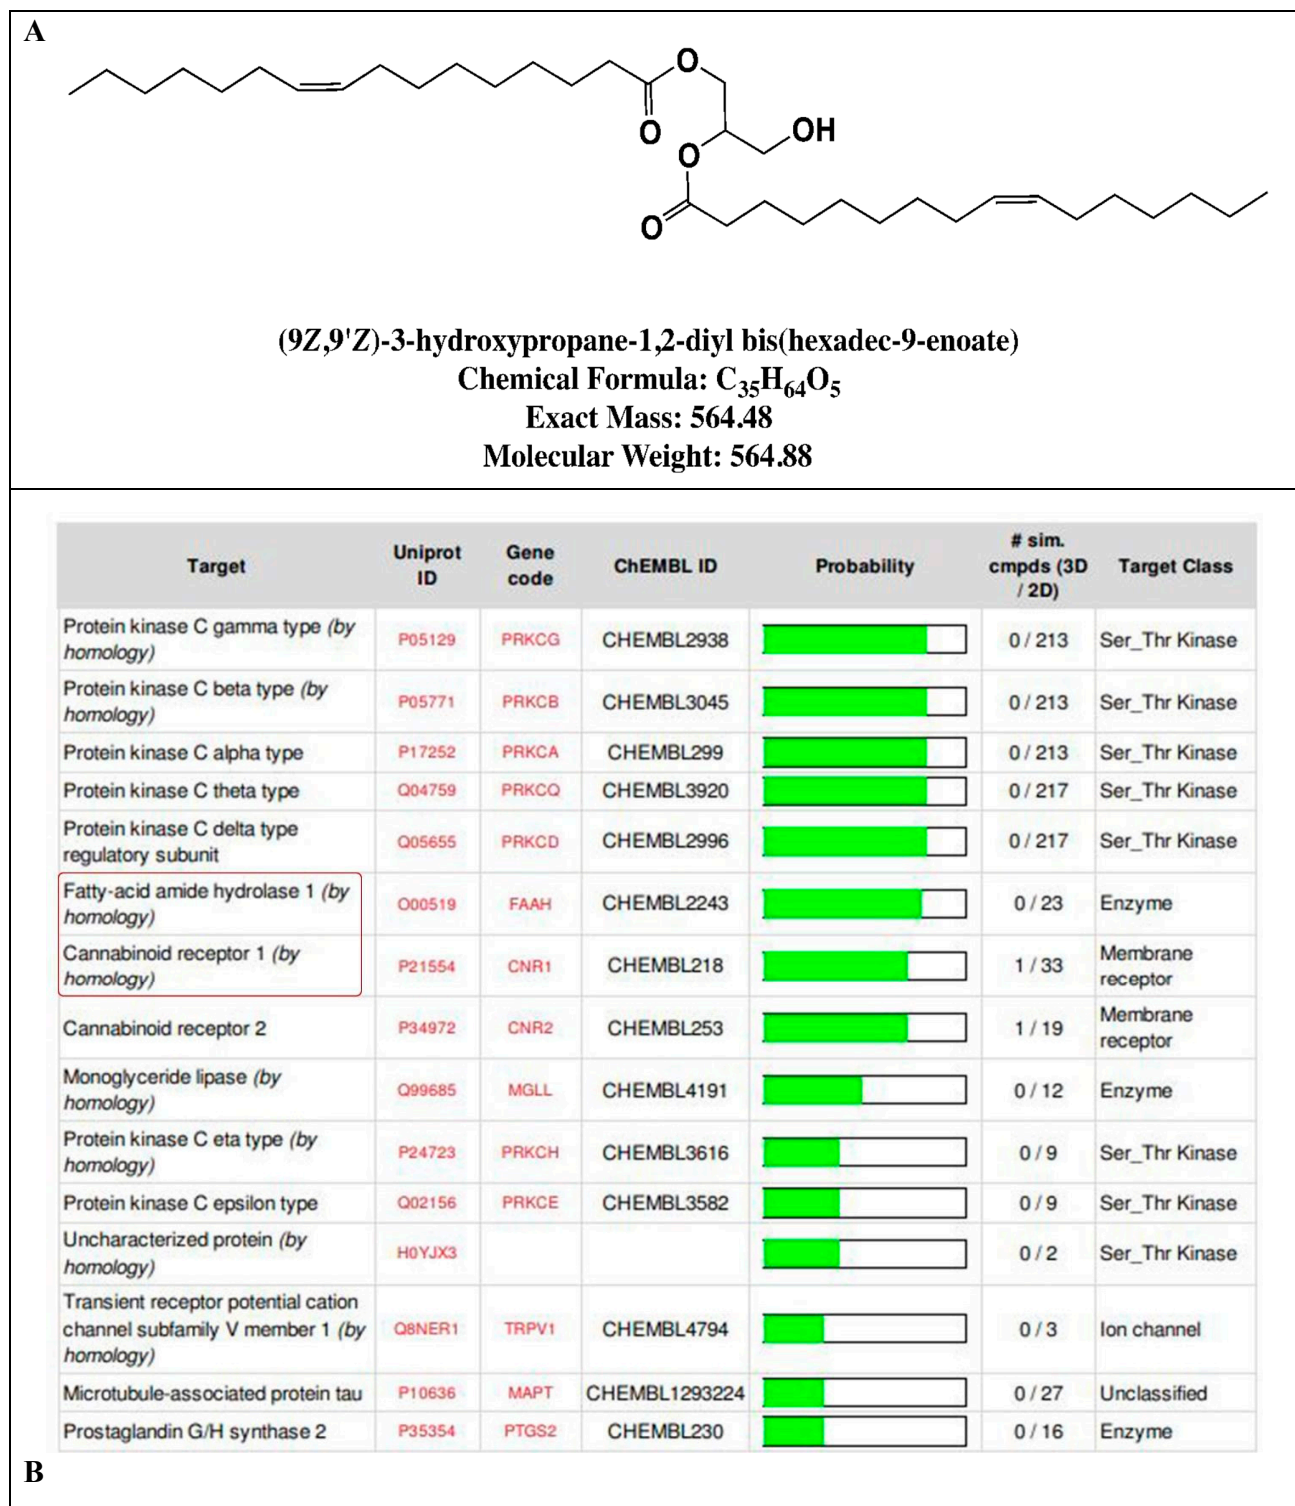

**Figure S1.** Structure of **C2** with molecular details (A) and Select targets used for the present study [SwissTargetPrediction server (version 2014) <http://old.swisstargetprediction.ch/> ] (B).

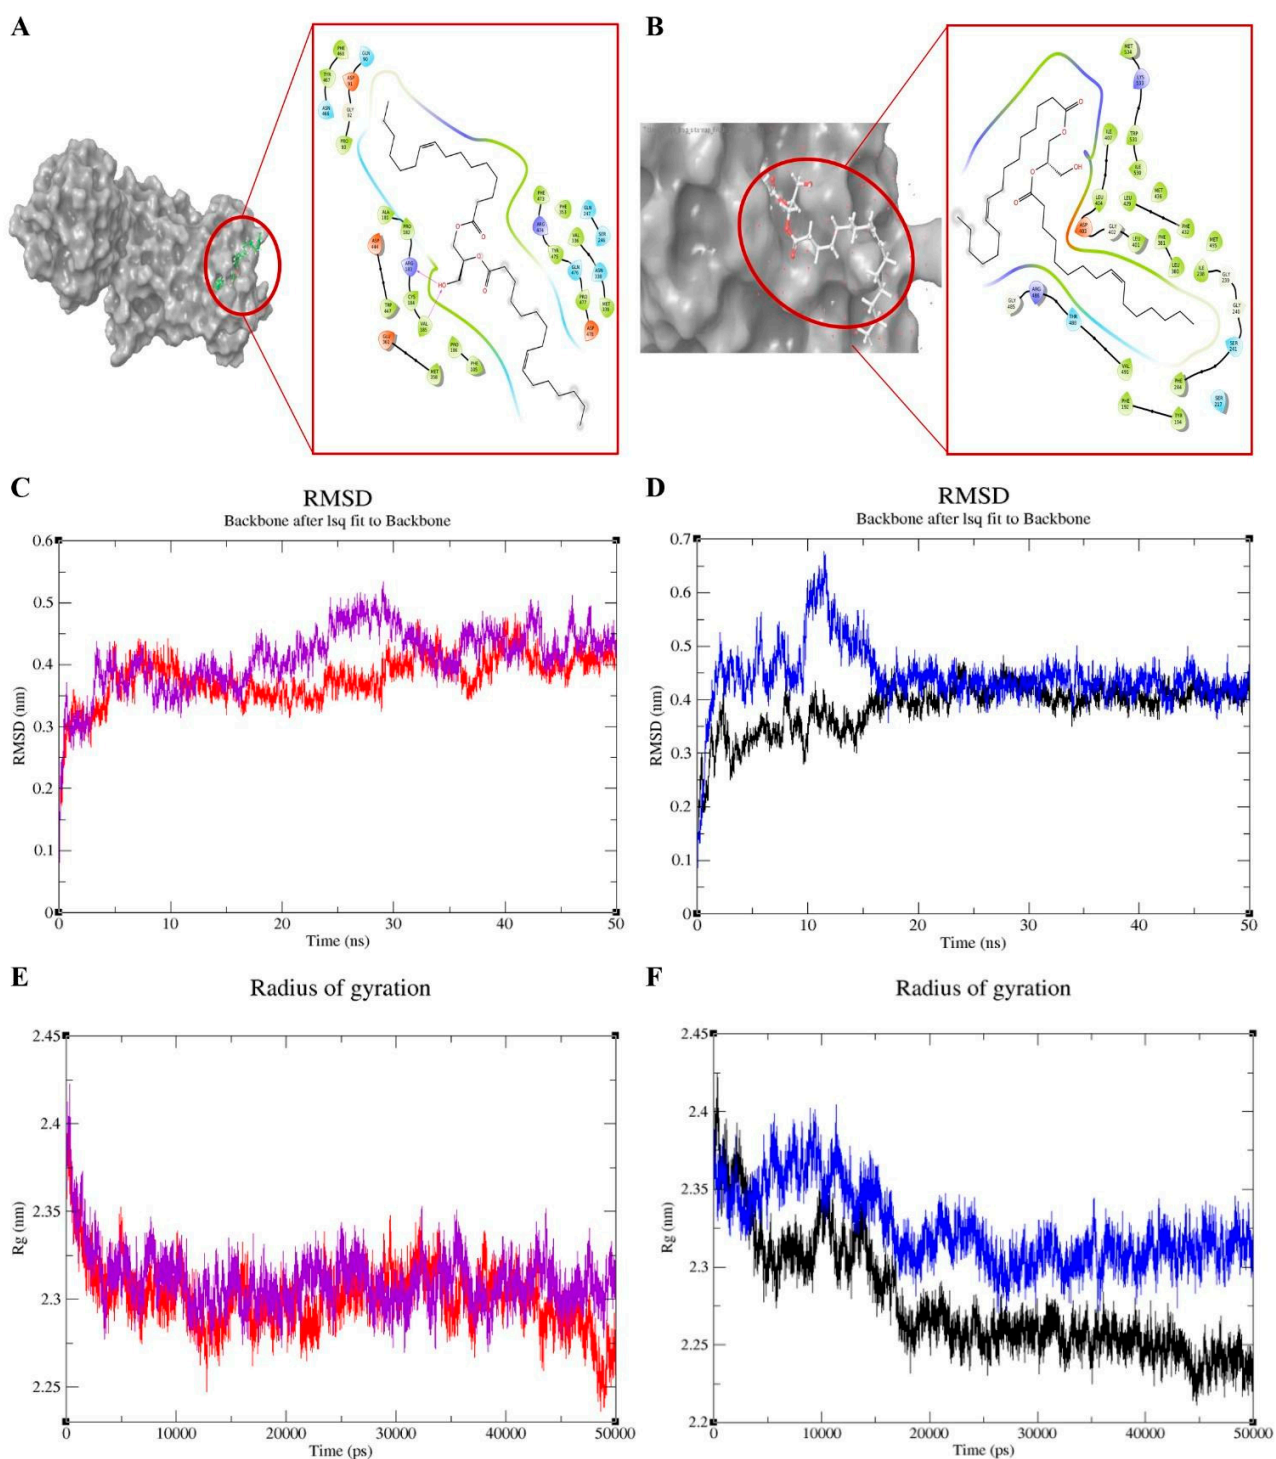

**Figure S2.** Molecular docking analysis (A, B), Root Mean Square Deviations (RMSD) (C, D) and Radius of gyrations (E, F) for C2-target [CB1 and FAAH1] complex [color coding: purple - CB1; red - CB1 with C2; blue – FAAH1; black - FAAH1 with C2].

**Figure S3. Total Ion Chromatogram at RT 17.9 min (538 m/z) indicate C:16 ceramides  
[Above: control; Below: treated]**

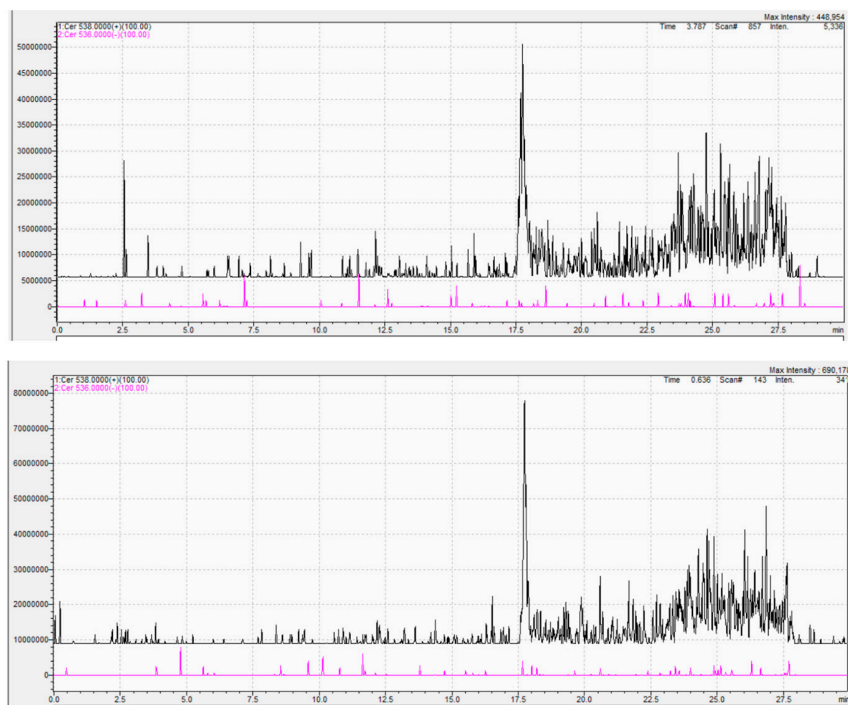

**Total Ion Chromatogram at RT 19.2 min (566 m/z) indicate C:18 ceramides  
[Above: control; Below: treated]**

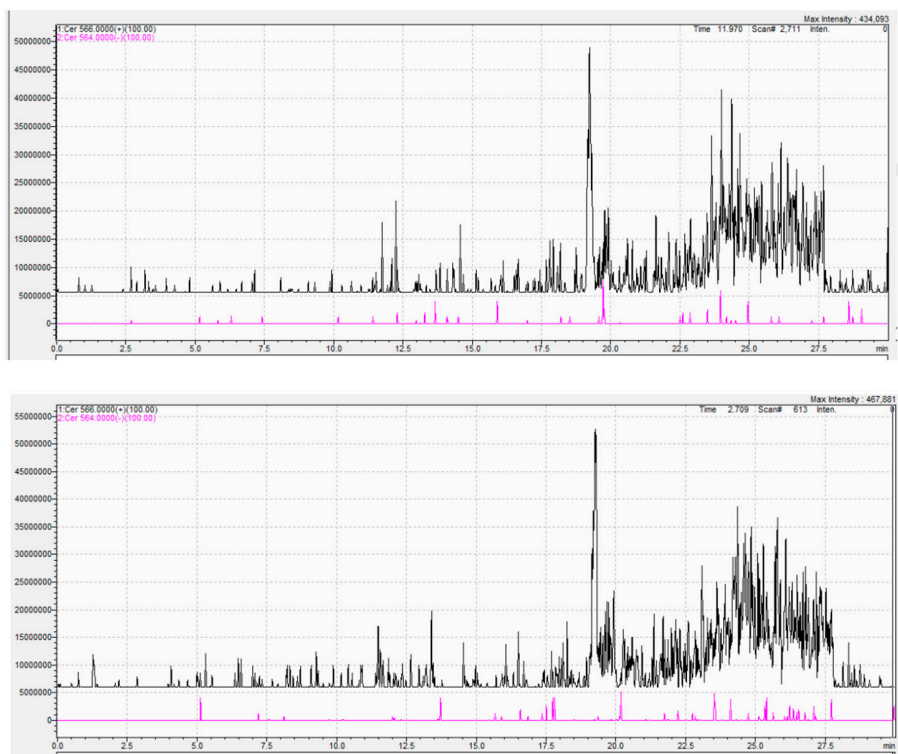

| Gene           | Orientation | Primer sequence 5'- 3'   | Reference / GenBank Accession Number |
|----------------|-------------|--------------------------|--------------------------------------|
| $\beta$ -Actin | F           | GGACTTCGAGGAAGAGATGG     | NM_001101.5                          |
|                | R           | AGCACTGTGTTGGCGTACAG     |                                      |
| BAX            | F           | GCTGGACATTGGACTTCCTC     | Elumalai et al., 2012                |
|                | R           | CTCAGCCCATCTTCTTCCAG     |                                      |
| BAD            | F           | CCTCAGGCCTATGCAAAAAG     |                                      |
|                | R           | AAACCCAAAACCTCCGATGG     |                                      |
| FasL           | F           | CCATGTGAAGAGGGAGAAGC     |                                      |
|                | R           | AAGACAGTCCCCCTTGAGGT     |                                      |
| Bcl-xL         | F           | GGCTGGGATACTTTTGTGGA     |                                      |
|                | R           | AAGAGTGAGCCCAGCAGAAC     |                                      |
| Bcl-2          | F           | ATTGGGAAGTTCAAATCAGC     |                                      |
|                | R           | TGCATTCTTGGACGAGGG       |                                      |
| FADD           | F           | AGATGAACCTGGTGGATGAC     |                                      |
|                | R           | AGGACGCTTCGGAGGTAGAT     |                                      |
| MMP2           | F           | TTTCCATTCCGCTTCCAGGGCAC  | Zhan et al., 2012                    |
|                | R           | TCGCACACCACATCTTTCCGTCCT |                                      |
| CB1            | F           | AGGAGTAAGGACCTGCGACA     | U73304.1                             |
|                | R           | TCTTGACCGTGCTCTTGATG     |                                      |
| FAAH1          | F           | GGCCACACCTTCCTACAGAA     | NM_001441.3                          |
|                | R           | GTTTTGCGGTACACCTCGAT     |                                      |

**Table S1.** Primer chart (forward and reverse) used in *q*-PCR studies
